# Supplementary material
Source: HighWire-hosted journal article supplement (https://gpsych.bmj.com/content/35/2/e100703)
Supplement: inline-supplementary-material-1 [file inline-supplementary-material-1.pdf]

**Table S1.** Tract-based spatial statistics (TBSS) analysis of fractional anisotropy (FA) in CHR group and HC group.

| Cluster Index       | 1-p value | MNI coordinates |     |    | White matter tracts                                                                                                                                                                                                                                                                                                                                                                                                                                                                                                                                                                                                                                                                                                                                                                                 |
|---------------------|-----------|-----------------|-----|----|-----------------------------------------------------------------------------------------------------------------------------------------------------------------------------------------------------------------------------------------------------------------------------------------------------------------------------------------------------------------------------------------------------------------------------------------------------------------------------------------------------------------------------------------------------------------------------------------------------------------------------------------------------------------------------------------------------------------------------------------------------------------------------------------------------|
|                     |           | x               | y   | z  |                                                                                                                                                                                                                                                                                                                                                                                                                                                                                                                                                                                                                                                                                                                                                                                                     |
| <b>FA CHR&lt;HC</b> | 0.998     | -14             | 25  | 19 | Genu, Body, Splenium of corpus callosum<br>Sagittal stratum (include inferior longitudinal Fasciculus and inferior fronto-occipital fasciculus) R L<br>Anterior, Posterior limb of internal capsule R L<br>Anterior, Superior, Posterior of corona radiata R L<br>Cerebral peduncle R L<br>External capsule R L<br>Cingulum (Cingulate Gyrus) R<br>Retrolenticular part of internal capsule R L<br>Fornix (cres) / Stria terminalis R L<br>Posterior thalamic radiation (include optic radiation) R L<br>Medial lemniscus R L<br>Fornix (column and body of fornix)<br>Superior longitudinal fasciculus R L                                                                                                                                                                                         |
| <b>RD CHR&gt;HC</b> | 0.988     | -14             | 25  | 19 | Genu, Body, Splenium of corpus callosum<br>Anterior, Posterior limb of internal capsule R L<br>Anterior, Superior, Posterior of corona radiata R L<br>Sagittal stratum (include inferior longitudinal Fasciculus and inferior fronto-occipital fasciculus) R L<br>Superior longitudinal fasciculus R L<br>Cerebral peduncle R L<br>Superior cerebellar peduncle R L<br>Inferior cerebellar peduncle L<br>Middle cerebellar peduncle<br>External capsule R L<br>Cingulum (Cingulate Gyrus) R<br>Posterior thalamic radiation (include optic radiation) R L<br>Retrolenticular part of internal capsule R L<br>Medial lemniscus R L<br>Fornix (column and body of fornix)<br>Fornix (cres) / Stria terminalis R L<br>Superior fronto-occipital fasciculus R<br>Pontine crossing tract (a part of MCP) |
| <b>MD CHR&gt;HC</b> | 0.993     | -36             | -56 | 21 | Genu, Body, Splenium of corpus callosum<br>Anterior, Posterior limb of internal capsule R<br>Anterior, Superior, Posterior of corona radiata R L<br>Superior longitudinal fasciculus R L<br>Cerebral peduncle R L<br>External capsule R L<br>Posterior thalamic radiation (include optic radiation) R L                                                                                                                                                                                                                                                                                                                                                                                                                                                                                             |

---

Sagittal stratum (include inferior longitudinal  
Fasciculus and inferior fronto-occipital fasciculus) R  
L  
Retrolenticular part of internal capsule R L  
Cingulum (Cingulate Gyrus) R  
Fornix (cres) / Stria terminalis R

---
